# Supplementary material for: Parameter Optimization of Support Vector Machine to Improve the Predictive Performance for Determination of Aflatoxin B1 in Peanuts by Olfactory Visualization Technique
Source: MDPI journal article supplement (doi:10.3390/molecules27196730), 2022-10-09
Supplement: s1 [file s1]

Table S1 The names of porphyrin materials used to prepare colorimetric sensor arrays.

| Number | Name                                                                      |
|--------|---------------------------------------------------------------------------|
| 1      | 5,10,15,20-Tetraphenyl-21H,23H-porphine                                   |
| 2      | 5,10,15,20-Tetrakis(4-methoxyphenyl)-21H,23H-porphine iron (III) chloride |
| 3      | 5,10,15,20-Tetraphenyl-21H,23H-porphine iron (III) chloride               |
| 4      | 5,10,15,20-Tetraphenyl-21H,23H-porphine copper (II)                       |
| 5      | 5,10,15,20-Tetrakis(4-methoxyphenyl)-21H,23H-porphine cobalt (II)         |
| 6      | 5,10,15,20-Tetraphenyl-21H,23H-porphine zinc                              |
| 7      | meso- Tetraphenyl porphyrin (chlorin free)                                |
| 8      | 2,3,7,8,12,13,17,18-Octaethyl-21H,23H-porphine copper (II)                |
| 9      | 2,3,7,8,12,13,17,18-Octaethyl-21H,23H-porphine                            |
| 10     | 5,10,15,20-Tetraphenyl-21H,23H-porphine vanadium (IV) oxide               |
| 11     | 5,10,15,20- Tetraphenyl -21H,23H-porphine ruthenium (II) carbonyl         |
| 12     | 2,3,7,8,12,13,17,18-Octaethyl-21H,23H-porphine ruthenium (II) carbonyl    |

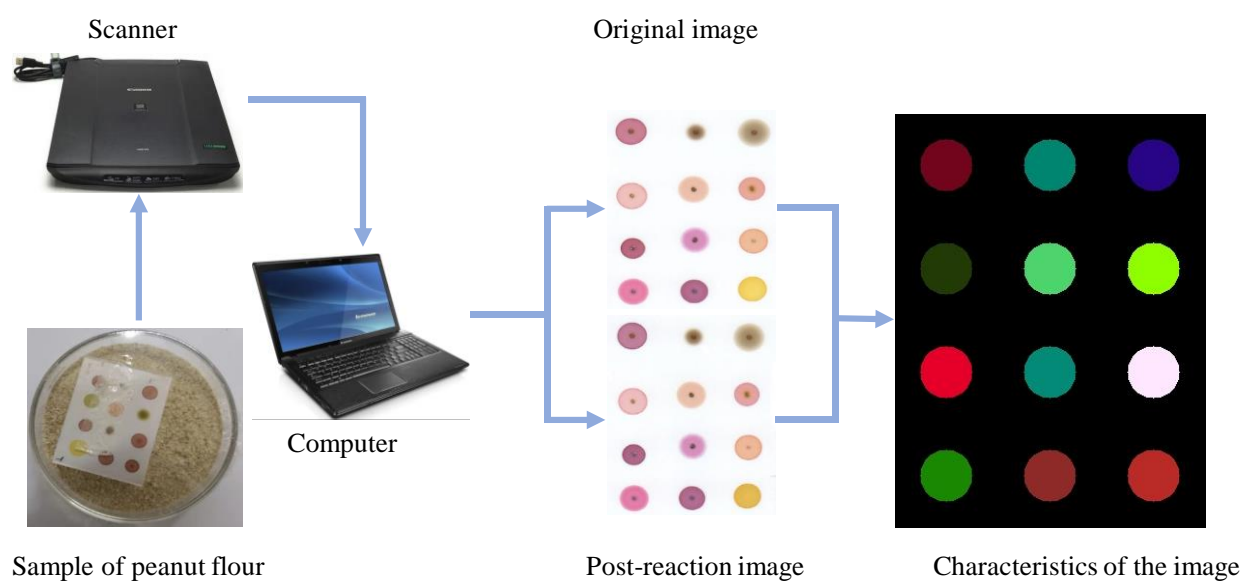

Figure S1 Data acquisition and pretreatment process of the olfactory visualization system.
